# Supplementary material
Source: PubMed Central journal article supplement (PMC5600618)
Supplement: NIHMS857261-supplement-Suppl.pdf [file NIHMS857261-supplement-Suppl.pdf]

## Supplementary Online Content

Weidhaas JB, Harris J, Schae D, et al. The *KRAS*-variant and cetuximab response in head and neck squamous cell cancer: a secondary analysis of a randomized clinical trial. *JAMA Oncol*. Published online December 22, 2016. doi:10.1001/jamaoncol.2016.5478

**eTable 1.** Pretreatment Characteristics by Whether or Not *KRAS* Genotype Is Known

**eTable 2.** Pretreatment Characteristics by *KRAS* Genotype and Assigned Treatment

**eTable 3.** TGF $\beta$ 1 by p16 and *KRAS*-Variant Status

**eTable 4.** Grade 3-4 Treatment-Related [1] Radiation Mucositis by *KRAS*-Variant and Assigned Treatment

**eTable 5.** Grade 3-4 Treatment-Related [1] Skin Reaction Inside Portal [2] by *KRAS*-Variant and Assigned Treatment

**eTable 6.** Grade 3-4 Treatment-Related [1] Skin Reaction Outside Portal [2] by *KRAS*-Variant and Assigned Treatment

**eFigure 1.** CONSORT Flow Diagram RTOG 0522

**eFigure 2.** Distant Metastasis

**eFigure 3.** Local Regional Failure

This supplementary material has been provided by the authors to give readers additional information about their work.

**eTable 1.** Pretreatment Characteristics by Whether or Not *KRAS* Genotype Is Known

|                                 | KRAS genotype known |               | p-value            |
|---------------------------------|---------------------|---------------|--------------------|
|                                 | Yes<br>(n=413)      | No<br>(n=478) |                    |
| Assigned treatment              |                     |               | 1.00 <sup>43</sup> |
| No cetuximab                    | 207 (50.1%)         | 240 (50.2%)   |                    |
| Cetuximab                       | 206 (49.9%)         | 238 (49.8%)   |                    |
| Age (years)                     |                     |               | 0.02 [3]           |
| Mean                            | 57.5                | 56.3          |                    |
| Std. Dev.                       | 7.88                | 8.36          |                    |
| Median                          | 58                  | 56            |                    |
| Min - Max                       | 31 - 77             | 34 - 79       |                    |
| Q1 - Q3                         | 52 - 63             | 50 - 62       |                    |
| Gender                          |                     |               | 0.76 <sup>43</sup> |
| Male                            | 366 (88.6%)         | 420 (87.9%)   |                    |
| Female                          | 47 (11.4%)          | 58 (12.1%)    |                    |
| Race                            |                     |               | 0.13 <sup>43</sup> |
| White                           | 382 (92.5%)         | 428 (89.5%)   |                    |
| Non-white                       | 31 (7.5%)           | 50 (10.5%)    |                    |
| Zubrod performance status       |                     |               | 0.09 <sup>43</sup> |
| 0                               | 260 (63.0%)         | 327 (68.4%)   |                    |
| 1                               | 153 (37.0%)         | 151 (31.6%)   |                    |
| Smoking history: pack-years [1] | (n=367)             | (n=404)       | 0.93 [3]           |
| Mean                            | 27.4                | 27.8          |                    |
| Std. Dev.                       | 27.50               | 28.75         |                    |
| Median                          | 23.5                | 20.7          |                    |
| Min - Max                       | 0 - 162             | 0 - 150       |                    |
| Q1 - Q3                         | 1 - 42              | 0.1 - 44.9    |                    |

**eTable 1.** Pretreatment Characteristics by Whether or Not *KRAS* Genotype Is Known

|                              | KRAS genotype known |               | p-value            |
|------------------------------|---------------------|---------------|--------------------|
|                              | Yes<br>(n=413)      | No<br>(n=478) |                    |
| Primary site                 |                     |               | 0.24 <sup>43</sup> |
| Oropharynx                   | 298 (72.2%)         | 327 (68.4%)   |                    |
| Hypopharynx/larynx           | 115 (27.8%)         | 151 (31.6%)   |                    |
| p16 status (oropharynx only) | (n=188)             | (n=133)       | 0.37 <sup>43</sup> |
| p16-negative                 | 54 (28.7%)          | 32 (24.1%)    |                    |
| p16-positive                 | 134 (71.3%)         | 101 (75.9%)   |                    |
| T stage                      |                     |               | 0.33 [3]           |
| T2                           | 170 (41.2%)         | 181 (37.9%)   |                    |
| T3                           | 149 (36.1%)         | 180 (37.7%)   |                    |
| T4                           | 94 (22.8%)          | 117 (24.5%)   |                    |
| N stage                      |                     |               | 0.79 [3]           |
| N0                           | 46 (11.1%)          | 53 (11.1%)    |                    |
| N1                           | 36 (8.7%)           | 45 (9.4%)     |                    |
| N2a                          | 37 (9.0%)           | 41 (8.6%)     |                    |
| N2b                          | 139 (33.7%)         | 154 (32.2%)   |                    |
| N2c                          | 137 (33.2%)         | 159 (33.3%)   |                    |
| N3                           | 18 (4.4%)           | 26 (5.4%)     |                    |

Std. Dev. = standard deviation; Q1 = first quartile; Q3 = third quartile.

[1] A pack-year is defined as the equivalent of smoking one pack of cigarettes a day for 1 year.

<sup>43</sup> Fisher's exact test.

[3] Wilcoxon rank-sum test.

**eTable 2.** Pretreatment Characteristics by *KRAS* Genotype and Assigned Treatment

|                                    | Non-variant (TT)        |                      | <i>KRAS</i> -variant (GG/TG) |                     |
|------------------------------------|-------------------------|----------------------|------------------------------|---------------------|
|                                    | No Cetuximab<br>(n=169) | Cetuximab<br>(n=174) | No Cetuximab<br>(n=38)       | Cetuximab<br>(n=32) |
| Age (years)                        | <b>p=0.05</b>           |                      | p=0.22                       |                     |
| Mean                               | 56.7                    | 58.5                 | 57.6                         | 55.6                |
| Standard deviation                 | 8.19                    | 7.59                 | 8.29                         | 6.81                |
| Median                             | 57                      | 59                   | 58                           | 54.5                |
| Min - Max                          | 31 - 77                 | 41 - 76              | 38 - 75                      | 42 - 69             |
| Q1 - Q3                            | 52 - 62                 | 53 - 64              | 53 - 63                      | 51 - 61             |
| Gender                             | p=0.31                  |                      | p=0.44                       |                     |
| Male                               | 146 (86.4%)             | 157 (90.2%)          | 33 (86.8%)                   | 30 (93.8%)          |
| Female                             | 23 (13.6%)              | 17 ( 9.8%)           | 5 (13.2%)                    | 2 (6.3%)            |
| Ethnicity                          | p=0.69                  |                      | <b>p=0.04</b>                |                     |
| White                              | 157 (92.9%)             | 159 (91.4%)          | 38 (100.0%)                  | 28 (87.5%)          |
| Non-white                          | 12 (7.1%)               | 15 (8.6%)            | 0 (0.0%)                     | 4 (12.5%)           |
| Zubrod performance status          | p=0.74                  |                      | p=1.00                       |                     |
| 0                                  | 109 (64.5%)             | 109 (62.6%)          | 23 (60.5%)                   | 19 (59.4%)          |
| 1                                  | 60 (35.5%)              | 65 (37.4%)           | 15 (39.5%)                   | 13 (40.6%)          |
| Smoking history: pack-years<br>[1] | p=0.69                  |                      | p=0.14                       |                     |
|                                    | (n=150)                 | (n=154)              | (n=35)                       | (n=28)              |
| Mean                               | 26.5                    | 26.7                 | 35.1                         | 26.8                |
| Standard deviation                 | 26.08                   | 29.24                | 26.52                        | 26.10               |
| Median                             | 27.25                   | 17.8                 | 34                           | 20.5                |
| Min - Max                          | 0 - 150                 | 0 - 162              | 0 - 90                       | 0 - 110             |
| Q1 - Q3                            | 1.35 - 40               | 0 - 42               | 4.5 - 51                     | 3 - 40.35           |
| Primary site                       | p=0.47                  |                      | p=0.79                       |                     |
| Oropharynx                         | 118 (69.8%)             | 128 (73.6%)          | 29 (76.3%)                   | 23 (71.9%)          |
| Hypopharynx/larynx                 | 51 (30.2%)              | 46 (26.4%)           | 9 (23.7%)                    | 9 (28.1%)           |

**eTable 2.** Pretreatment Characteristics by *KRAS* Genotype and Assigned Treatment

|                        | Non-variant (TT)        |                      | <i>KRAS</i> -variant (GG/TG) |                     |
|------------------------|-------------------------|----------------------|------------------------------|---------------------|
|                        | No Cetuximab<br>(n=169) | Cetuximab<br>(n=174) | No Cetuximab<br>(n=38)       | Cetuximab<br>(n=32) |
| p16 status (all sites) | p=0.59                  |                      | p=0.14                       |                     |
|                        | (n=108)                 | (n=118)              | (n=22)                       | (n=23)              |
| p16-negative           | 50 ( 46.3%)             | 50 ( 42.4%)          | 13 ( 59.1%)                  | 8 ( 34.8%)          |
| p16-positive           | 58 ( 53.7%)             | 68 ( 57.6%)          | 9 ( 40.9%)                   | 15 ( 65.2%)         |
| T stage                | p=0.39                  |                      | p=0.24                       |                     |
| T2                     | 64 ( 37.9%)             | 74 ( 42.5%)          | 16 ( 42.1%)                  | 16 ( 50.0%)         |
| T3                     | 64 ( 37.9%)             | 62 ( 35.6%)          | 11 ( 28.9%)                  | 12 ( 37.5%)         |
| T4                     | 41 ( 24.3%)             | 38 ( 21.8%)          | 11 ( 28.9%)                  | 4 ( 12.5%)          |
| N stage                | p=0.07                  |                      | p=0.12                       |                     |
| N0                     | 11 ( 6.5%)              | 23 ( 13.2%)          | 5 ( 13.2%)                   | 7 ( 21.9%)          |
| N1                     | 19 ( 11.2%)             | 14 ( 8.0%)           | 1 ( 2.6%)                    | 2 ( 6.3%)           |
| N2a                    | 11 ( 6.5%)              | 19 ( 10.9%)          | 4 ( 10.5%)                   | 3 ( 9.4%)           |
| N2b                    | 57 ( 33.7%)             | 58 ( 33.3%)          | 12 ( 31.6%)                  | 12 ( 37.5%)         |
| N2c                    | 63 ( 37.3%)             | 54 ( 31.0%)          | 13 ( 34.2%)                  | 7 ( 21.9%)          |
| N3                     | 8 ( 4.7%)               | 6 ( 3.4%)            | 3 ( 7.9%)                    | 1 ( 3.1%)           |

Q1 = first quartile; Q3 = third quartile.

[1] A pack-year is defined as the equivalent of smoking one pack of cigarettes a day for 1 year.

[P-values for age, pack-years, T stage, and N stage are from Wilcoxon rank-sum test.

P-values for gender, race, Zubrod performance status, primary site, and p16 status are from Fisher's exact test.

**eTable 3.** TGFB1 by p16 and *KRAS*-Variant Status

|                                        | n   | Min     | Q1       | Median   | Q3       | Max       |
|----------------------------------------|-----|---------|----------|----------|----------|-----------|
| p16-negative, <i>KRAS</i> -non-variant | 91  | 2757.51 | 10155.76 | 18989.05 | 28145.41 | 121030.02 |
| p16-positive, <i>KRAS</i> -non-variant | 117 | 2261.42 | 7740.52  | 15284.42 | 32292.91 | 119449.13 |
| p16-negative, <i>KRAS</i> -variant     | 20  | 5034.35 | 13106.36 | 23254.16 | 43662.46 | 97677.11  |
| p16-positive, <i>KRAS</i> -variant     | 23  | 5070.55 | 10152.63 | 20083.48 | 53024.57 | 85081.77  |

(p=0.34 by Kruskal-Wallis test)

---

**eTable 4.** Grade 3-4 Treatment-Related [1] Radiation Mucositis by *KRAS*-Variant and Assigned Treatment

| <i>KRAS</i> | Assigned Treatment | Patients | Events      | Odds Ratio<br>(95% Confidence Interval) |
|-------------|--------------------|----------|-------------|-----------------------------------------|
| Non-variant | No cetuximab       | 169      | 64 (37.9%)  | Reference                               |
|             | Cetuximab          | 174      | 88 (50.6%)  | 1.68 (1.09-2.58)<br>p=0.02              |
| Variant     | No cetuximab       | 38       | 18 (47.4%)  | Reference                               |
|             | Cetuximab          | 32       | 16 (50.0%)  | 1.11 (0.43-2.85)<br>p=0.83              |
| Total       |                    | 413      | 186 (45.0%) | interaction p=0.43                      |

Odds ratios estimated from logistic regression model with covariates *KRAS* (variant vs. Non-variant), treatment (cetuximab vs. no cetuximab) and the interaction of *KRAS* and treatment.

[1] Definitely, probably, or possibly related to protocol treatment.

**eTable 5.** Grade 3-4 Treatment-Related [1] Skin Reaction Inside Portal [2] by *KRAS*-Variant and Assigned Treatment

| <i>KRAS</i> | Assigned Treatment | Patients | Events     | Odds Ratio<br>(95% Confidence Interval) |
|-------------|--------------------|----------|------------|-----------------------------------------|
| Non-variant | No cetuximab       | 169      | 19 (11.2%) | Reference                               |
|             | Cetuximab          | 174      | 38 (21.8%) | 2.21 (1.21-4.01)<br>p=0.01              |
| Variant     | No cetuximab       | 38       | 7 (18.4%)  | Reference                               |
|             | Cetuximab          | 32       | 5 (15.6%)  | 0.82 (0.23-2.89)<br>p=0.76              |
| Total       |                    | 413      | 69 (16.7%) | interaction p=0.16                      |

Odds ratios estimated from logistic regression model with covariates *KRAS* (variant vs. Non-variant), treatment (cetuximab vs. no cetuximab) and the interaction of *KRAS* and treatment.

[1] Definitely, probably, or possibly related to protocol treatment.

[2] Dermatitis radiation NOS; Radiation recall syndrome.



**eTable 6.** Grade 3-4 Treatment-Related [1] Skin Reaction Outside Portal [2] by *KRAS*-Variant and Assigned Treatment

| <i>KRAS</i> | Assigned Treatment | Patients | Events     | Odds Ratio<br>(95% Confidence Interval) |
|-------------|--------------------|----------|------------|-----------------------------------------|
| Non-variant | No cetuximab       | 169      | 1 (0.6%)   | Reference                               |
|             | Cetuximab          | 174      | 40 (23.0%) | 50.15 (6.81-369.54)<br>p<0.001          |
| Variant     | No cetuximab       | 38       | 1 (2.6%)   | Reference                               |
|             | Cetuximab          | 32       | 6 (18.8%)  | 8.54 (0.97-75.20)<br>p=0.05             |
| Total       |                    | 413      | 48 (11.6%) | interaction p=0.24                      |

Odds ratios estimated from logistic regression model with covariates *KRAS* (variant vs. Non-variant), treatment (cetuximab vs. no cetuximab) and the interaction of *KRAS* and treatment.

[1] Definitely, probably, or possibly related to protocol treatment.

[2] Pruritis; Dermatitis exfoliative NOS; Acne NOS; Nail disorder NOS.

**eFigure 1. CONSORT Flow Diagram RTOG 0522**

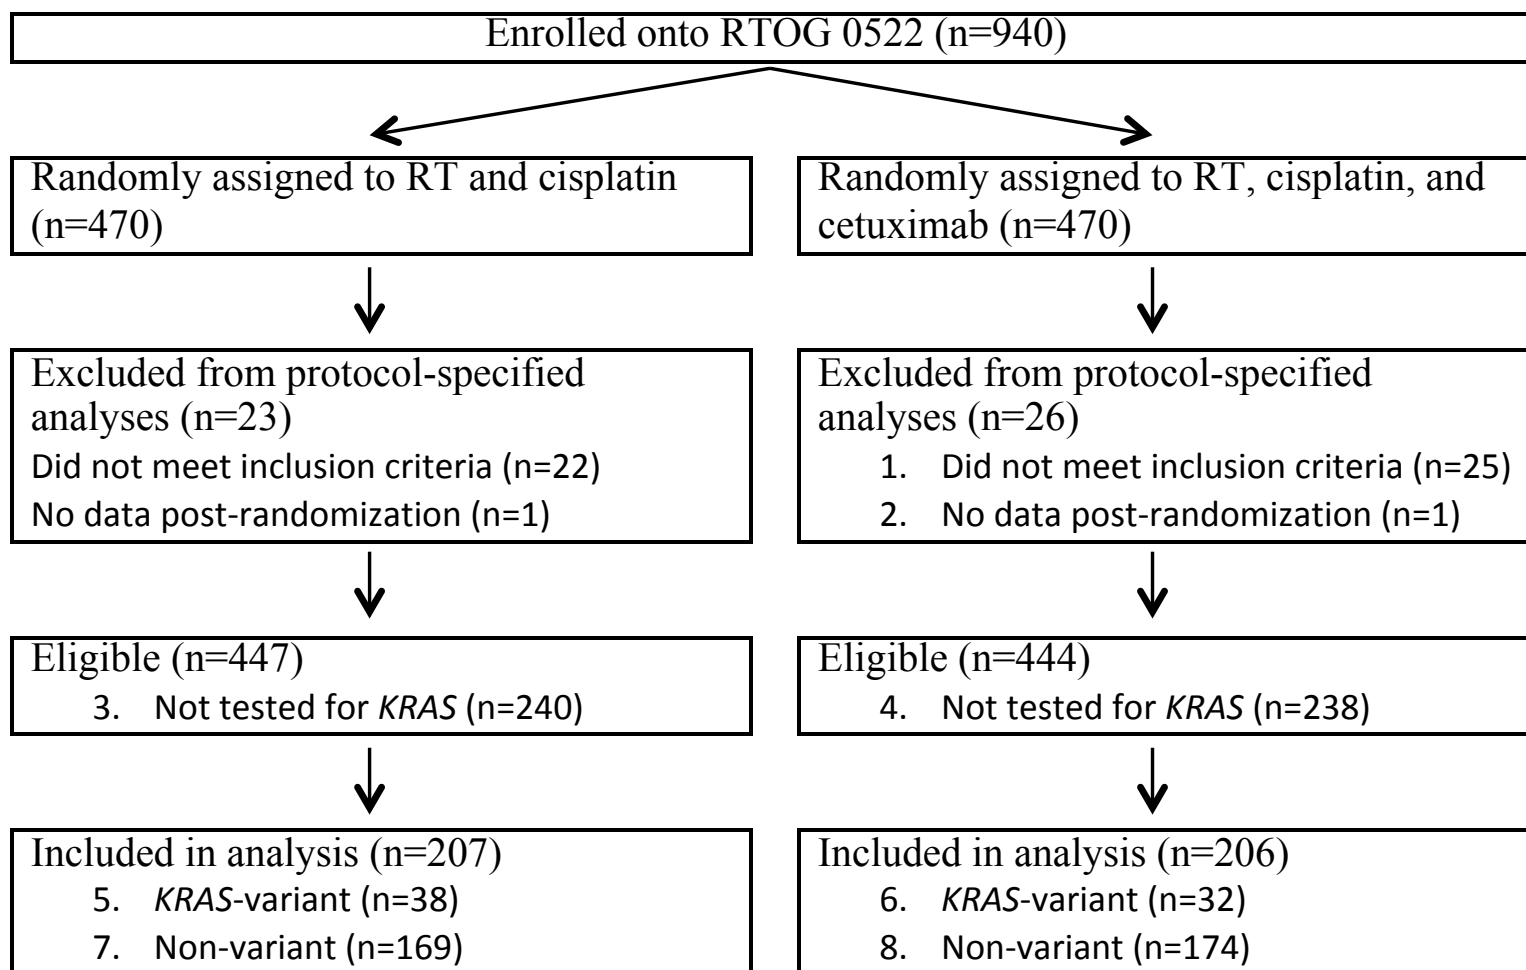

## eFigure 2. Distant metastasis

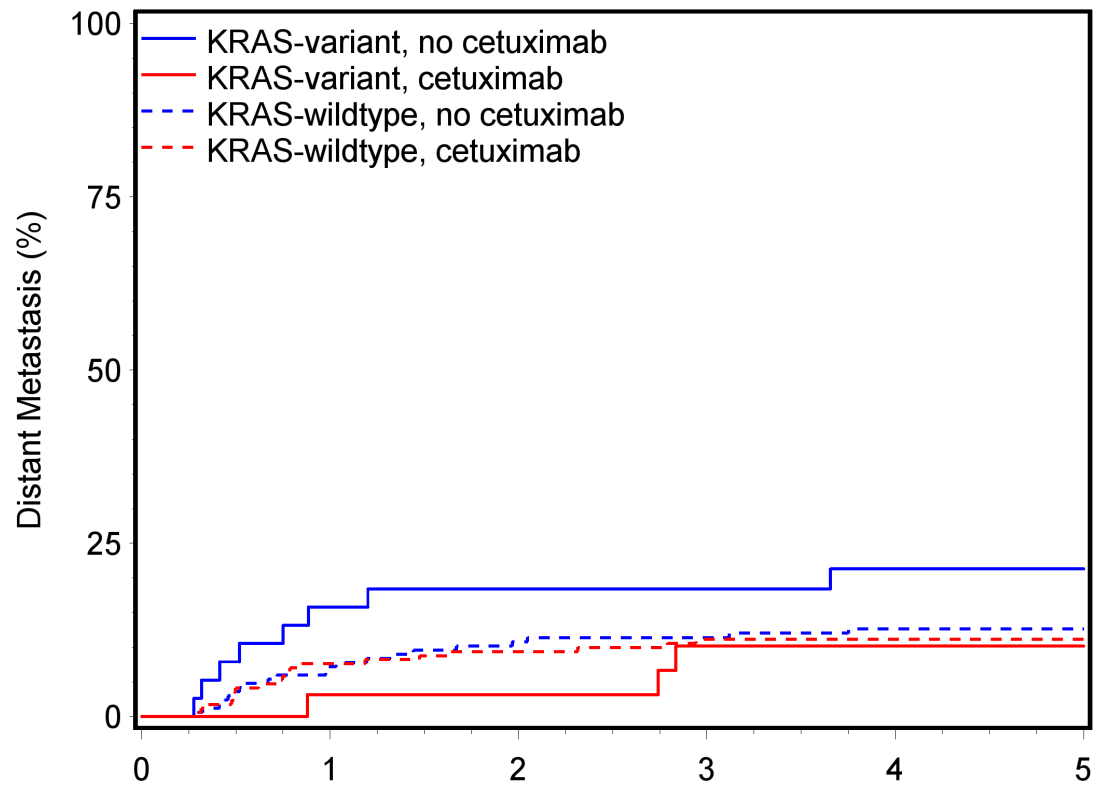

| No. at Risk   | Years after Randomization |     |     |    |    |    |
|---------------|---------------------------|-----|-----|----|----|----|
|               | 0                         | 1   | 2   | 3  | 4  | 5  |
| var, no cetux | 38                        | 25  | 23  | 23 | 16 | 11 |
| var, cetux    | 32                        | 28  | 23  | 17 | 14 | 8  |
| wt, no cetux  | 169                       | 127 | 109 | 97 | 88 | 38 |
| wt. cetux     | 174                       | 122 | 108 | 99 | 86 | 52 |

**eFigure 3. Local Regional Failure**

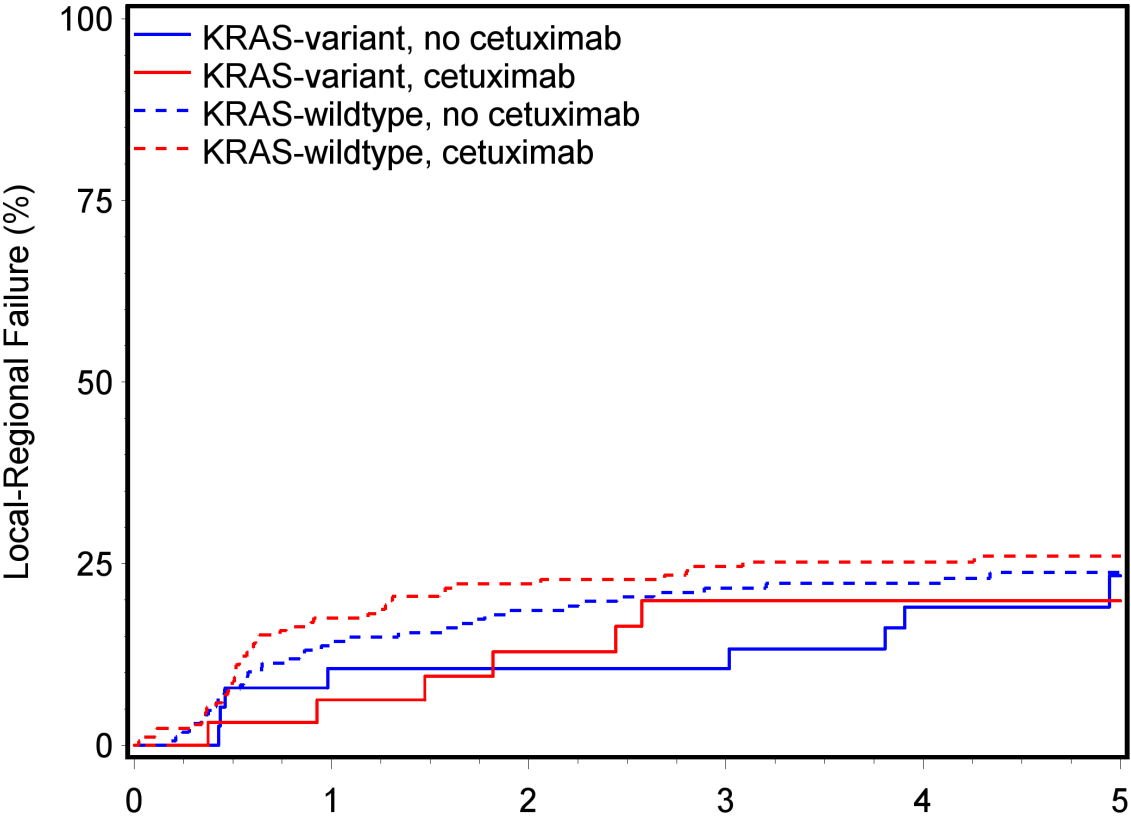

| No. at Risk   | Years after Randomization |     |     |    |    |    |
|---------------|---------------------------|-----|-----|----|----|----|
|               | 0                         | 1   | 2   | 3  | 4  | 5  |
| var, no cetux | 38                        | 25  | 23  | 23 | 16 | 11 |
| var, cetux    | 32                        | 28  | 23  | 17 | 14 | 8  |
| wt, no cetux  | 169                       | 127 | 109 | 97 | 88 | 38 |
| wt. cetux     | 174                       | 122 | 108 | 99 | 86 | 52 |

© 2016 American Medical Association. All rights reserved.
